# Supplementary material for: The Role of Physical Fitness in the Relationship between Nut Consumption and Body Composition in Young Adults
Source: MDPI journal article supplement (doi:10.3390/nu13062126), 2021-06-21
Supplement: s1 [file s1]

## SUPPLEMENTARY MATERIAL

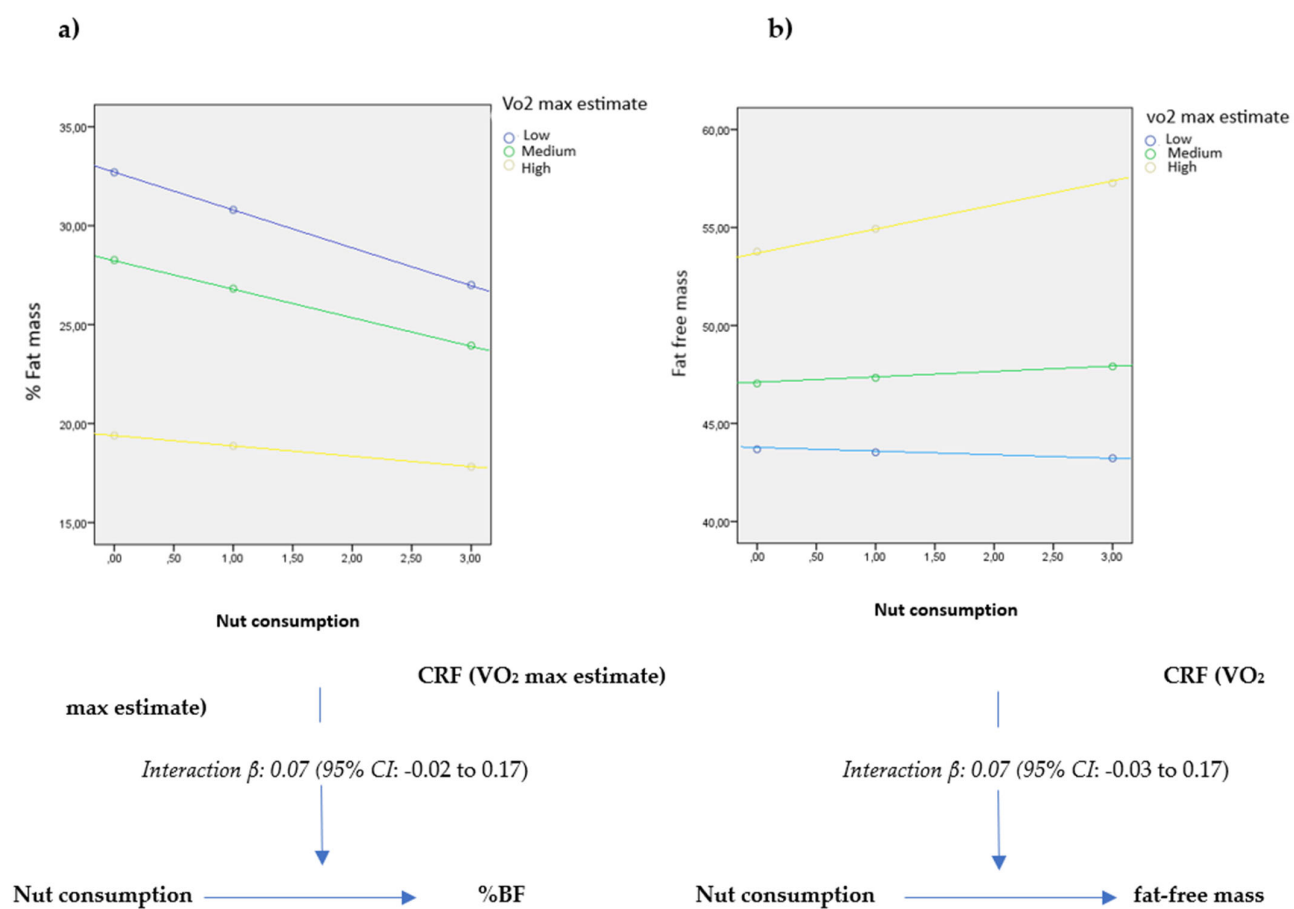

**Figure S1.** CRF (VO<sub>2</sub> max estimate) interactions models of the relationship between nut consumption and %BF (a) and fat-free mass (b). Adjusted by age and sex. Beta expressed as unstandardized regression coefficients and 95% confidence interval.
